# Supplementary material for: Relative Cation-Anion Diffusion in Alkyltriethylammonium-Based Ionic Liquids
Source: MDPI journal article supplement (doi:10.3390/ijms23115994), 2022-05-26
Supplement: s1 [file s1]

## Supplementary Material

for the article

### *Relative Cation-Anion Diffusion in Alkyltriethylammonium-based Ionic Liquids*

Danuta Kruk<sup>1\*</sup>, Elzbieta Masiewicz<sup>1</sup>, Karol Kolodziejwski<sup>1</sup>, Roksana Markiewicz<sup>2</sup>, Stefan Jurga<sup>2</sup>

<sup>1</sup>Department of Physics and Biophysics, University of Warmia & Mazury in Olsztyn,

Oczapowskiego 4, 10-719 Olsztyn, Poland

<sup>2</sup>NanoBioMedical Centre, Adam Mickiewicz University, Poznan, Wszechnicy Piastowskiej 3,

61-614 Poznan, Poland

Examples of <sup>19</sup>F magnetisation versus time for a series of ionic liquids: [TEA-C8][TFSI], [TEA-C10][TFSI], [TEA-C12][TFSI], [TEA-C14][TFSI] and [TEA-C16][TFSI], respectively.

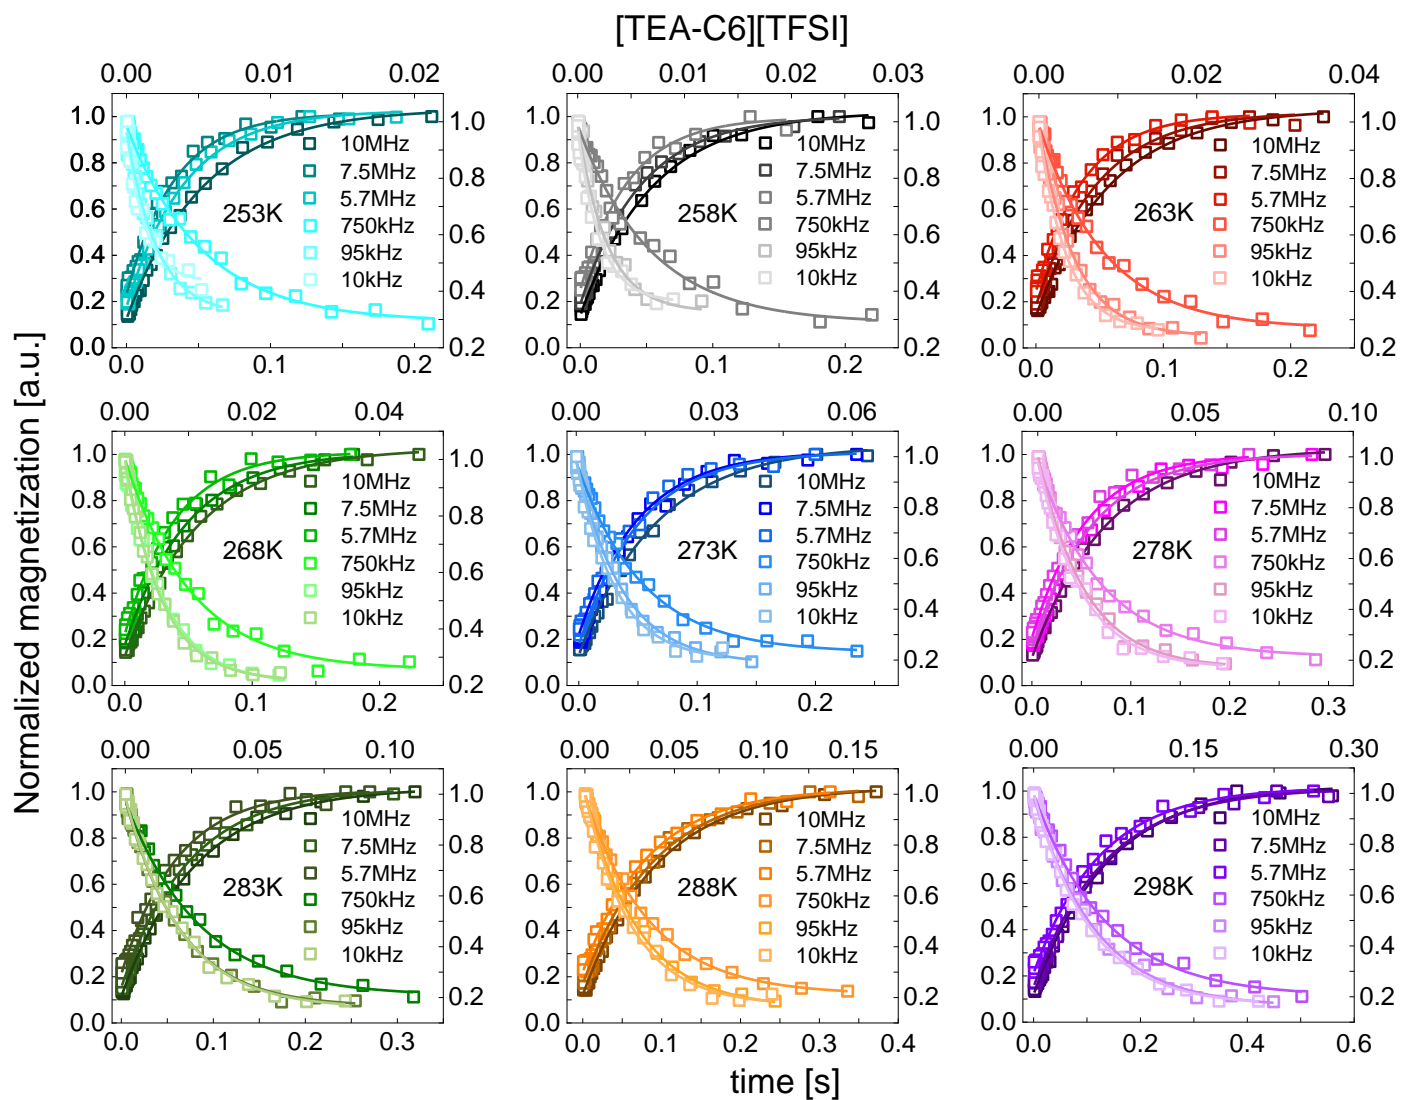

Figure S1.  $^{19}\text{F}$  magnetization curves for [TEA-C6][TFSI]. Solid lines denote single exponential fits. Bottom x and left y – 10MHz, 7.5MHz, 5.7MHz top x right y -750kHz, 95kHz, 10kHz.

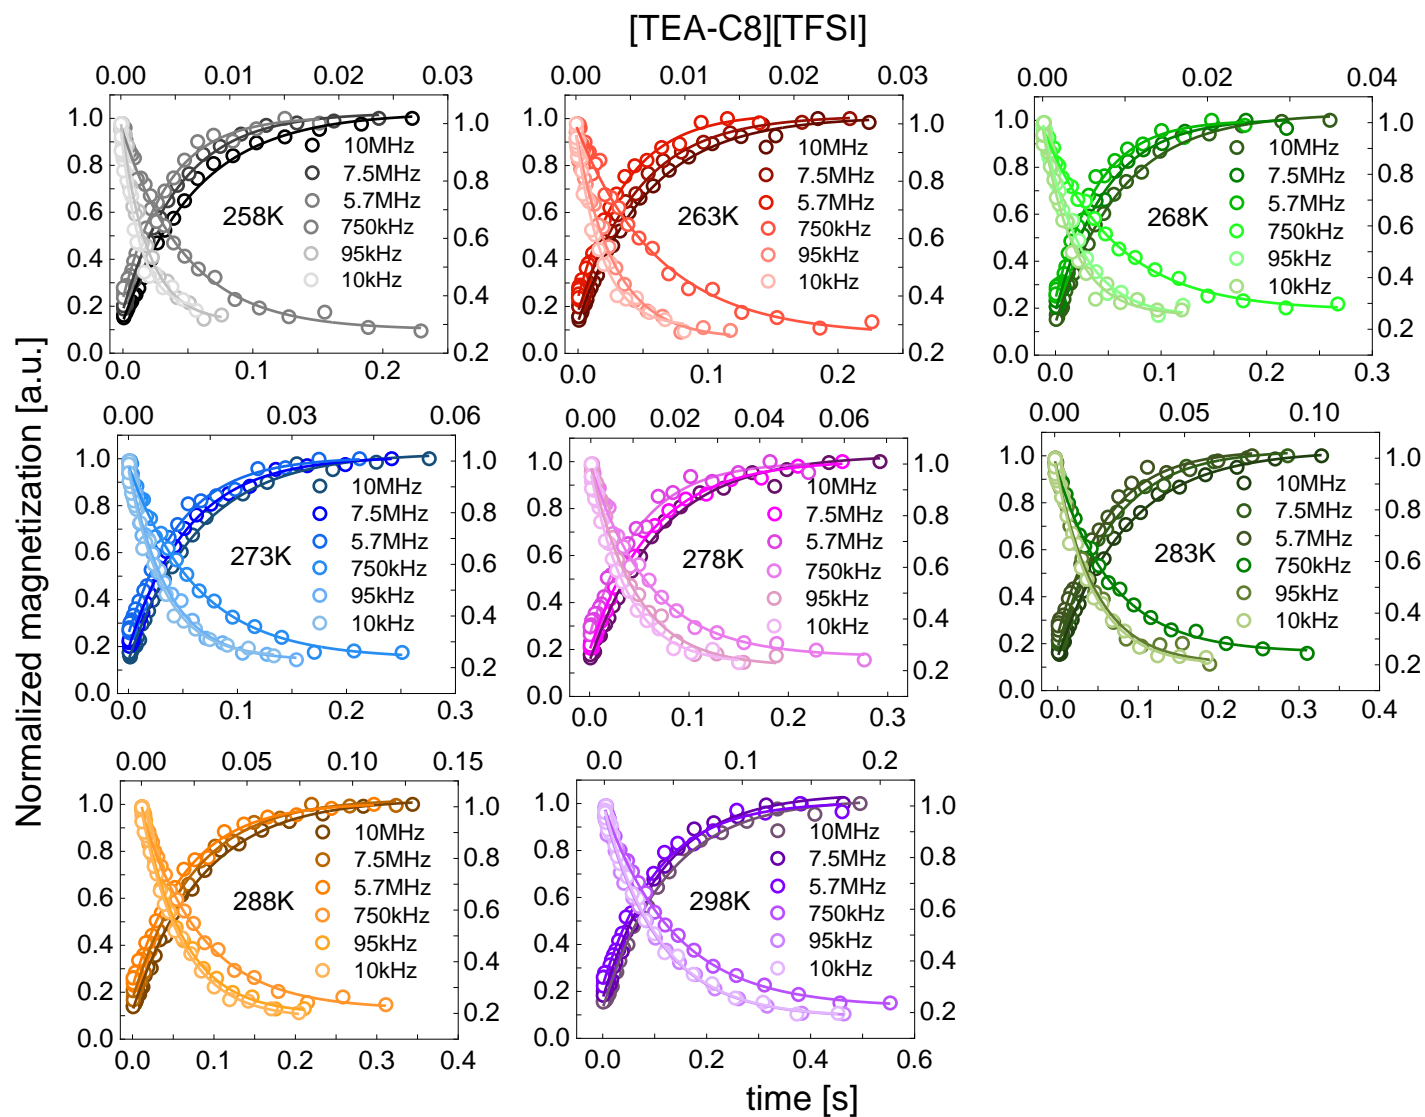

Figure S2.  $^{19}\text{F}$  magnetization curves for [TEA-C8] [TFSI]. Solid lines denote single exponential fits. Bottom x and left y – 10MHz, 7.5MHz, 5.7MHz top x right y -750kHz, 95kHz, 10kHz.

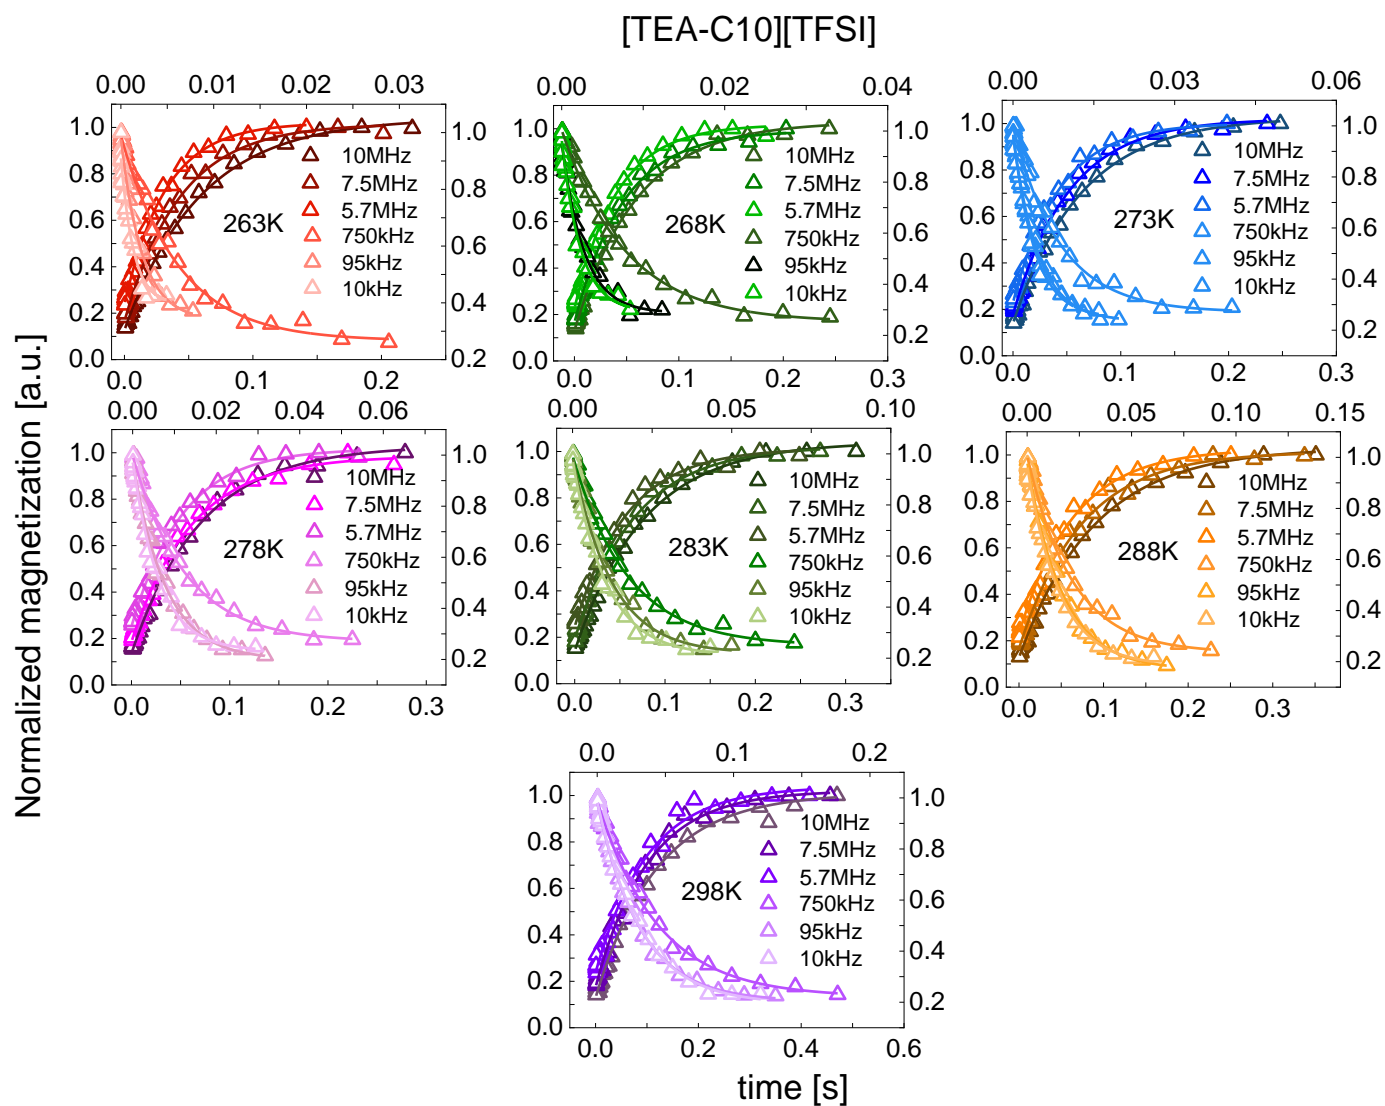

Figure S3.<sup>19</sup>F magnetization curves for [TEA-C10] [TFSI]. Solid lines denote single exponential fits. Bottom x and left y – 10MHz, 7.5MHz, 5.7MHz top x right y -750kHz, 95kHz, 10kHz.

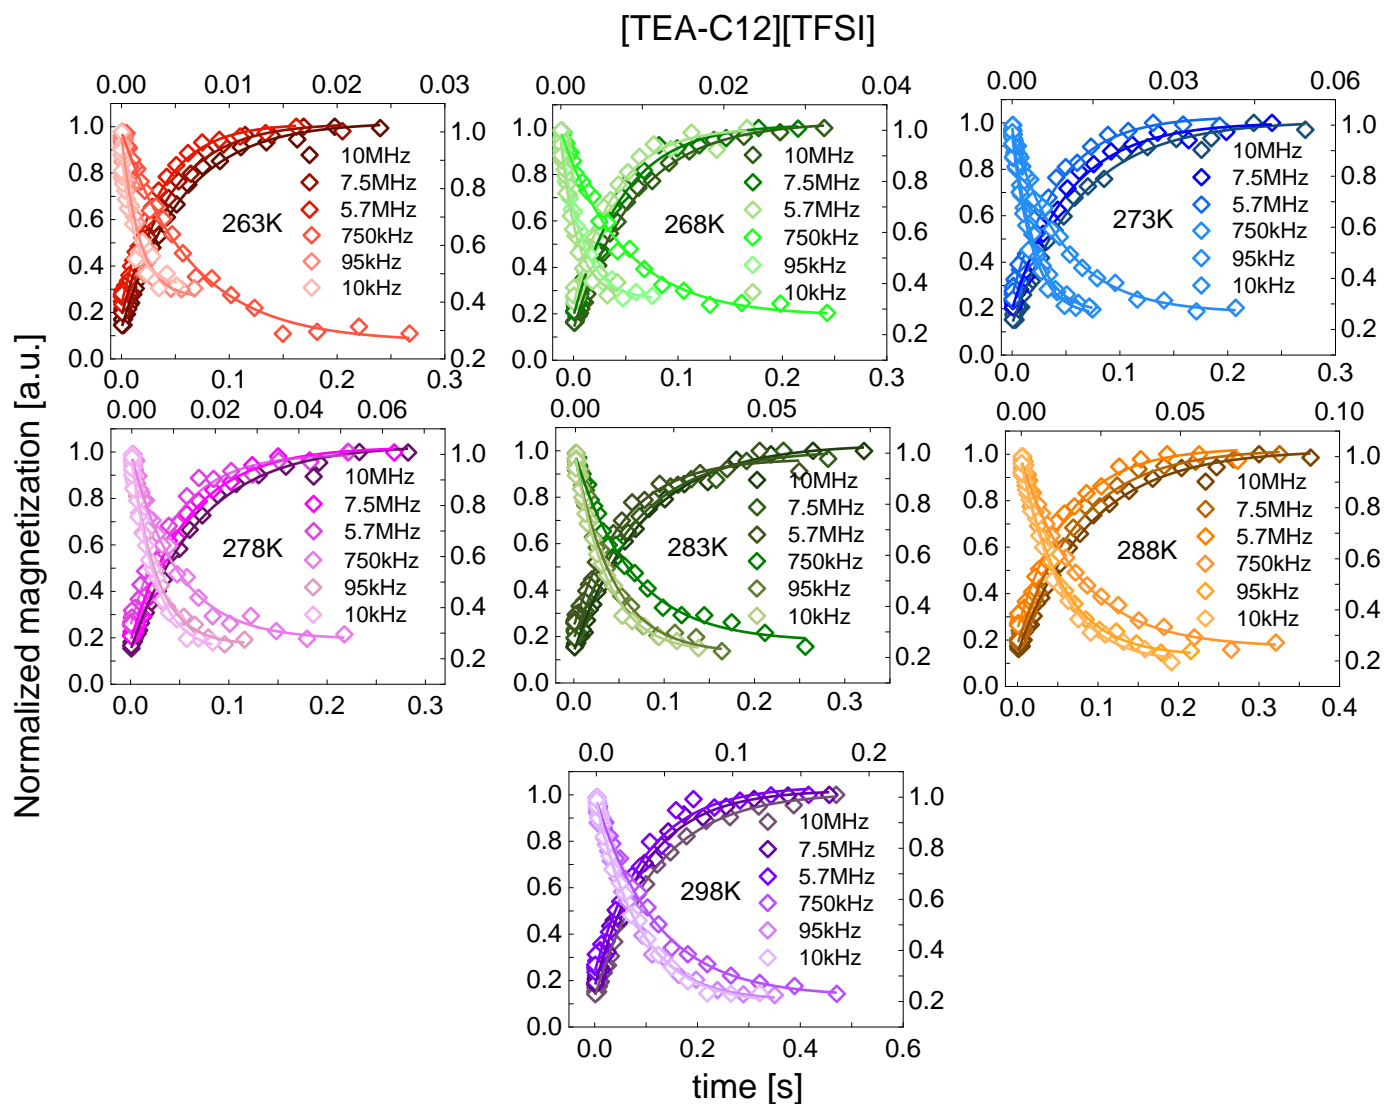

Figure S4.  $^{19}\text{F}$  magnetization curves for [TEA-C12] [TFSI]. Solid lines denote single exponential fits. Bottom x and left y – 10MHz, 7.5MHz, 5.7MHz top x right y -750kHz, 95kHz, 10kHz.

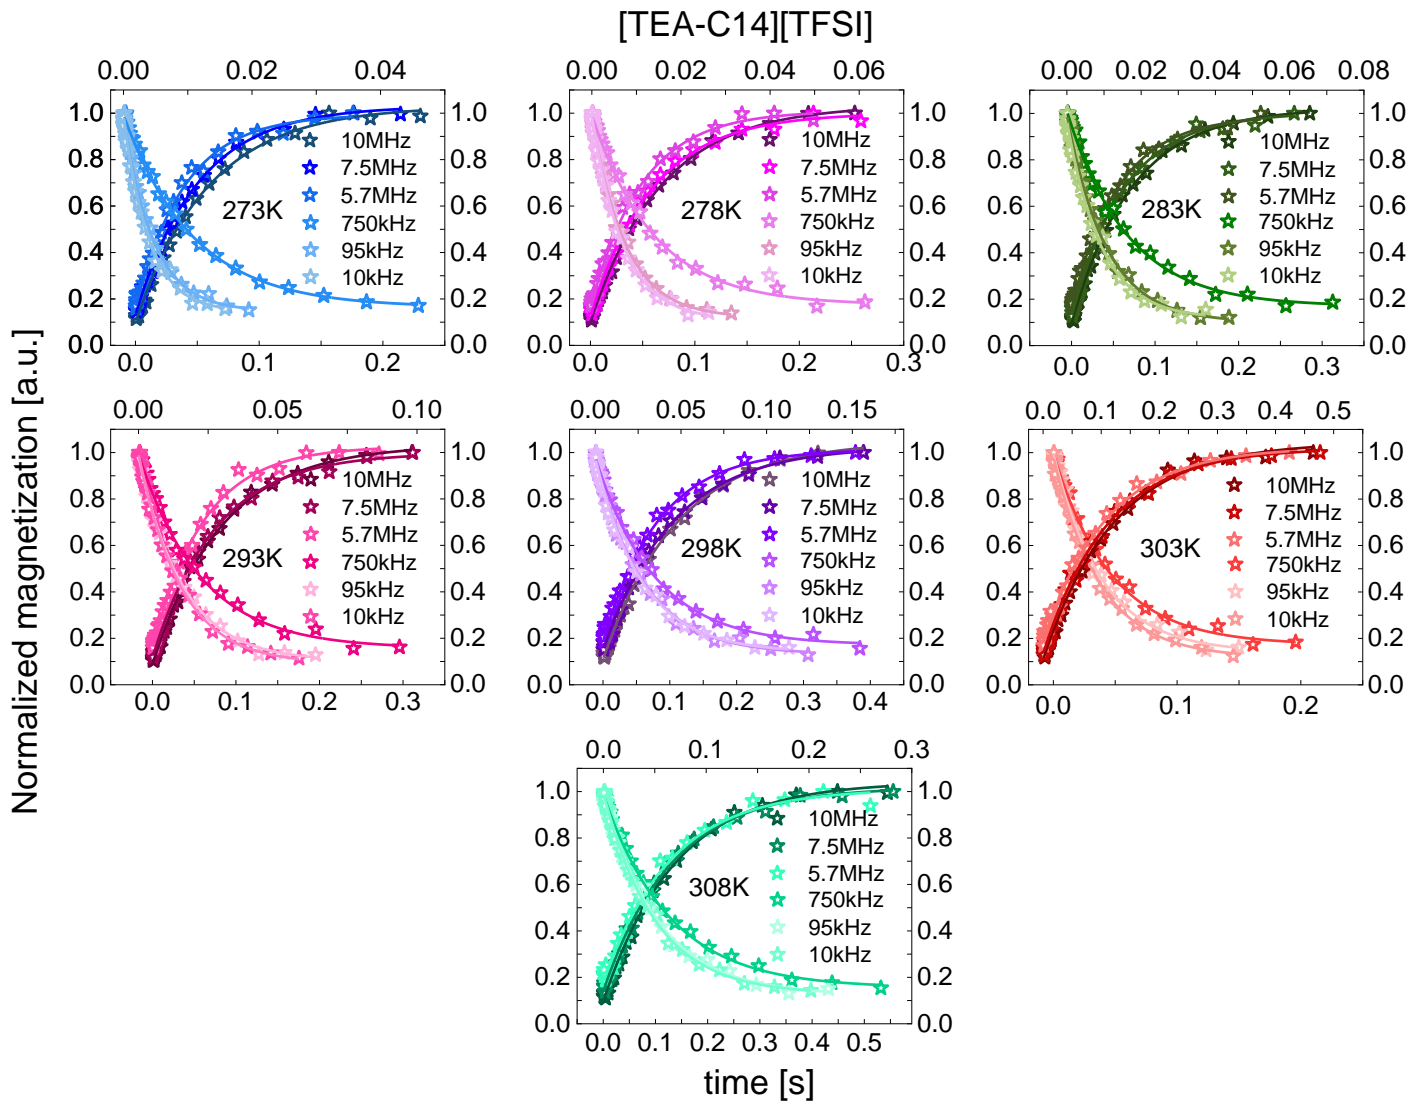

Figure S5.  $^{19}\text{F}$  magnetization curves for [TEA-C14] [TFSI]. Solid lines denote single exponential fits. Bottom x and left y – 10MHz, 7.5MHz, 5.7MHz top x right y -750kHz, 95kHz, 10kHz.

[TEA-C16][TFSI]

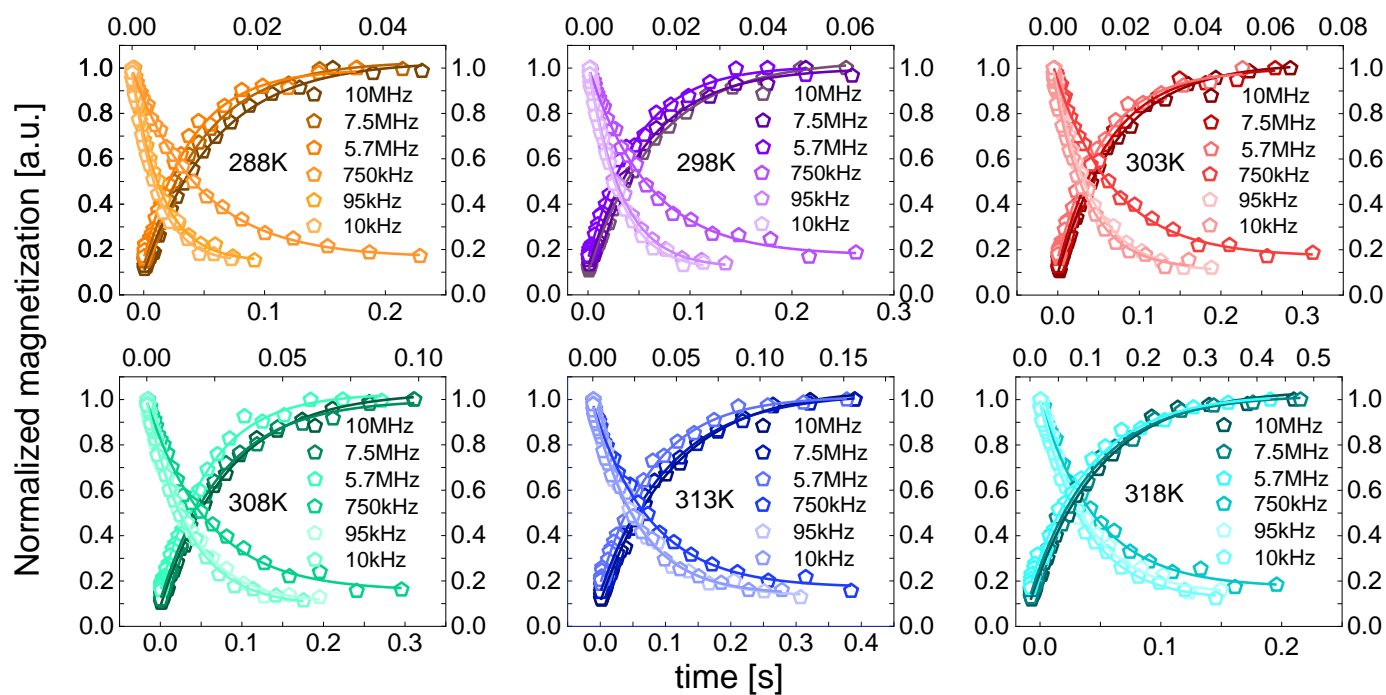

Figure S6.  $^{19}\text{F}$  magnetization curves for [TEA-C16] [TFSI]. Solid lines denote single exponential fits. Bottom x and left y – 10MHz, 7.5MHz, 5.7MHz top x right y -750kHz, 95kHz. 10kHz.
